# Supplementary material
Source: Springer Nature journal article supplement (http://www.springermedizin.de/resource/supplementary/12885_2001_30_MOESM1_ESM.pdf/9468736)

**EAPC**

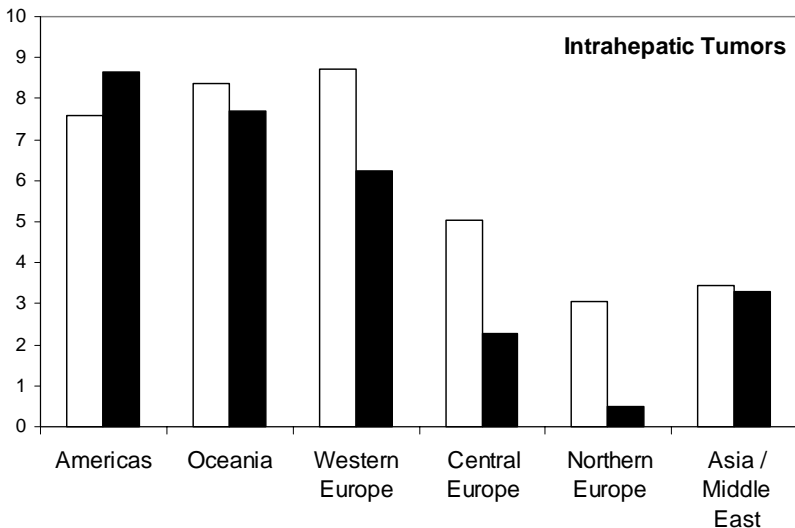

**EAPC**

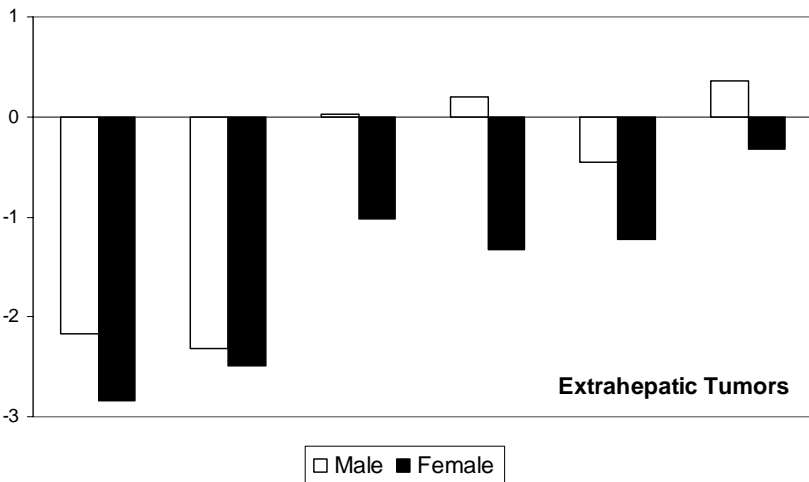

□ Male ■ Female

Supplement: MOESM1 [file 9468736]
